# Supplementary material for: In situ monitoring reveals cellular environmental instabilities in human pluripotent stem cell culture
Source: PubMed Central journal article supplement (PMC8826360; doi:10.1038/s42003-022-03065-w), 2022-02-08
Supplement: 42003_2022_3065_MOESM1_ESM.pdf [file 42003_2022_3065_MOESM1_ESM.pdf]

## Supplementary Information

### **In situ monitoring reveals cellular environmental instabilities in human pluripotent stem cell culture**

Shannon G. Klein<sup>1,+</sup>, Samhan M. Alsolami<sup>2,+</sup>, Silvia Arossa<sup>1</sup>, Gerardo Ramos Mandujano<sup>2</sup>, Anieka J. Parry<sup>1</sup>, Alexandra Steckbauer<sup>1</sup>, Carlos M. Duarte<sup>1,\*</sup>, and Mo Li<sup>2,\*</sup>.

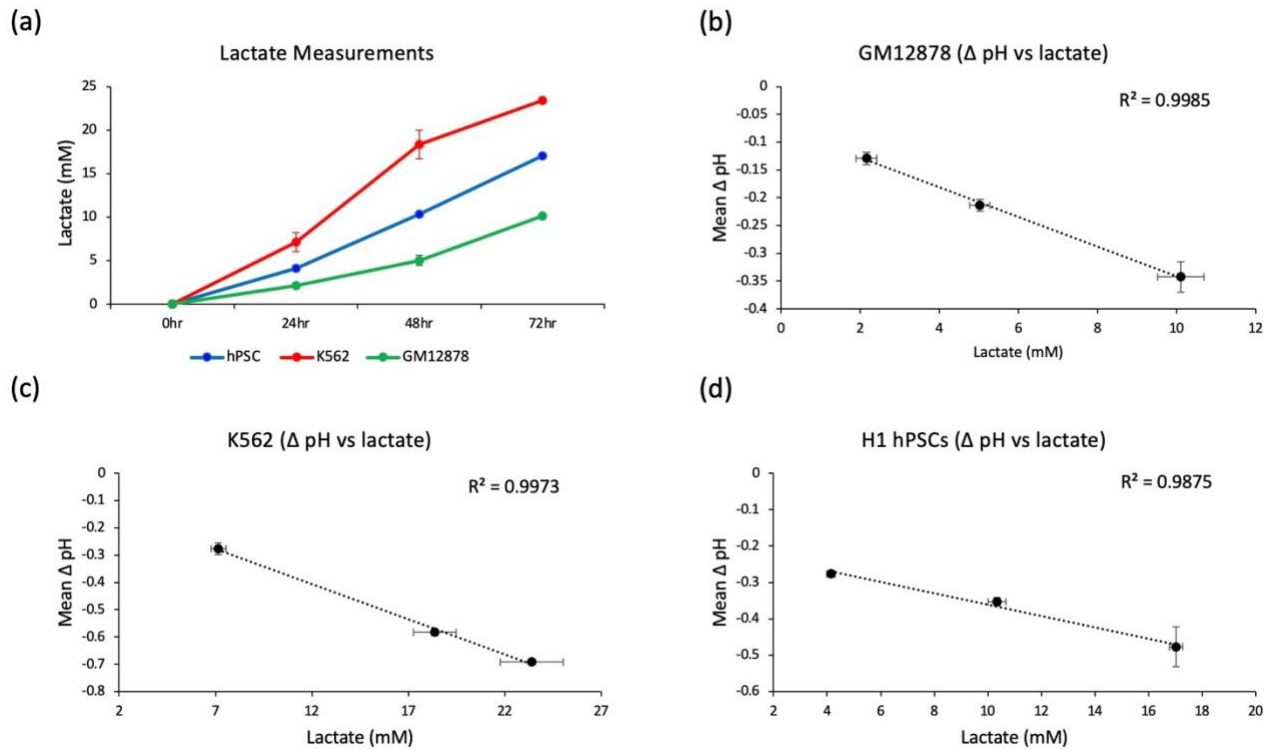

**Figure S1. Extracellular lactate measurements over the period of 72 hours for H1 hESC, K562, and GM12878, and the correlation of these data with changes in pH over the same period of time. (a)** Lactate microplate reader absorbance measurements for H1 hESC, K562, and GM12878, expressed in mM as referenced to a standard curve (cf. Methods). Measurements were done in duplicates for three biological replicates. **(b-d)** Lactate measurements correlated with changes of pH over the 72-hour culture period. Data points represent mean  $\pm$  1 standard error.

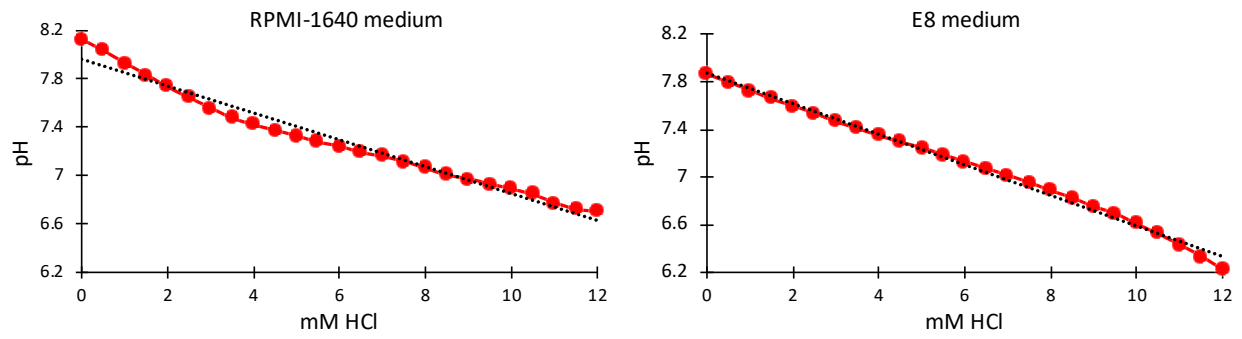

**Figure S2. Measured pH buffering capacity of the RPMI-1640 and E8 medium.** For RPMI-1640 and E8, the buffering capacity ( $\beta$ ) was determined using a stepwise addition of 0.5mM HCl to the culture media and recorded pH at each stepwise addition.

**Human embryonic stem cell line (hESC H1)**

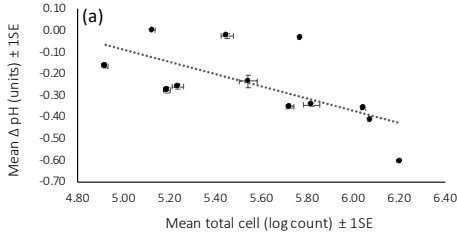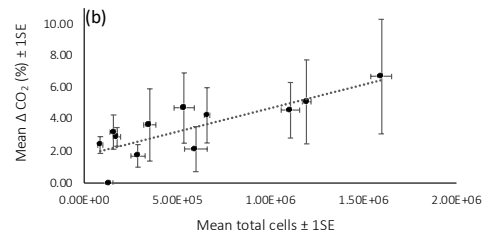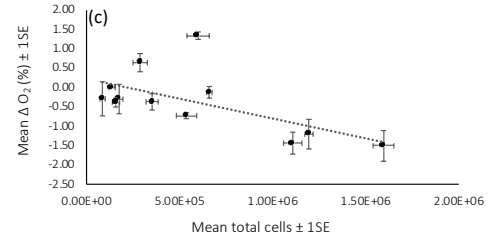

**Human erythroleukemia cell line (K562)**

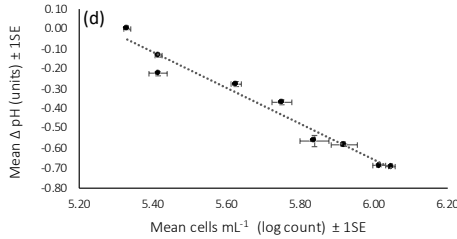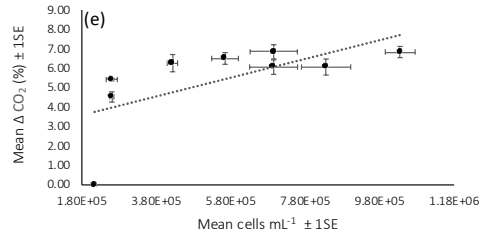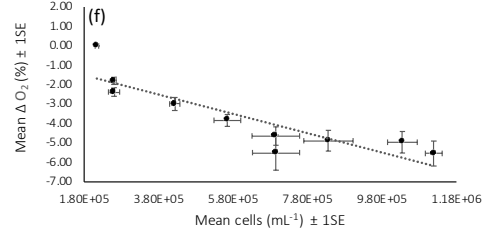

**Human lymphoblastoid cell line (GM12878)**

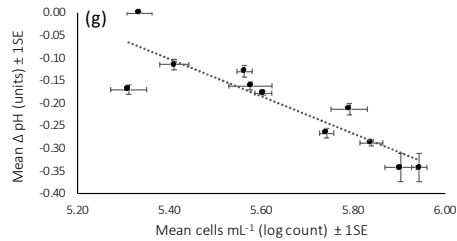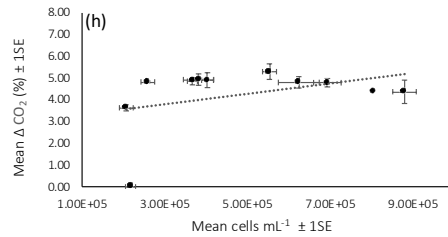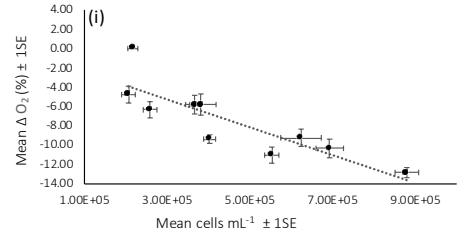

**Figure S3.** Relationships between changes in pH, dO<sub>2</sub>, and dCO<sub>2</sub> and cell density in the H1 hESC (panels a, b, c), K562 (panels d, e, f), and GM12878 (panels g, h, i) cell line cultures. Delta ( $\Delta$ ) values for pH, dO<sub>2</sub>, and dCO<sub>2</sub> represent the mean difference between the levels measured every eight hours during incubation minus measurements taken at time zero. Data points represent mean values across the three replicate flasks  $\pm$  1 standard error for each cell line.

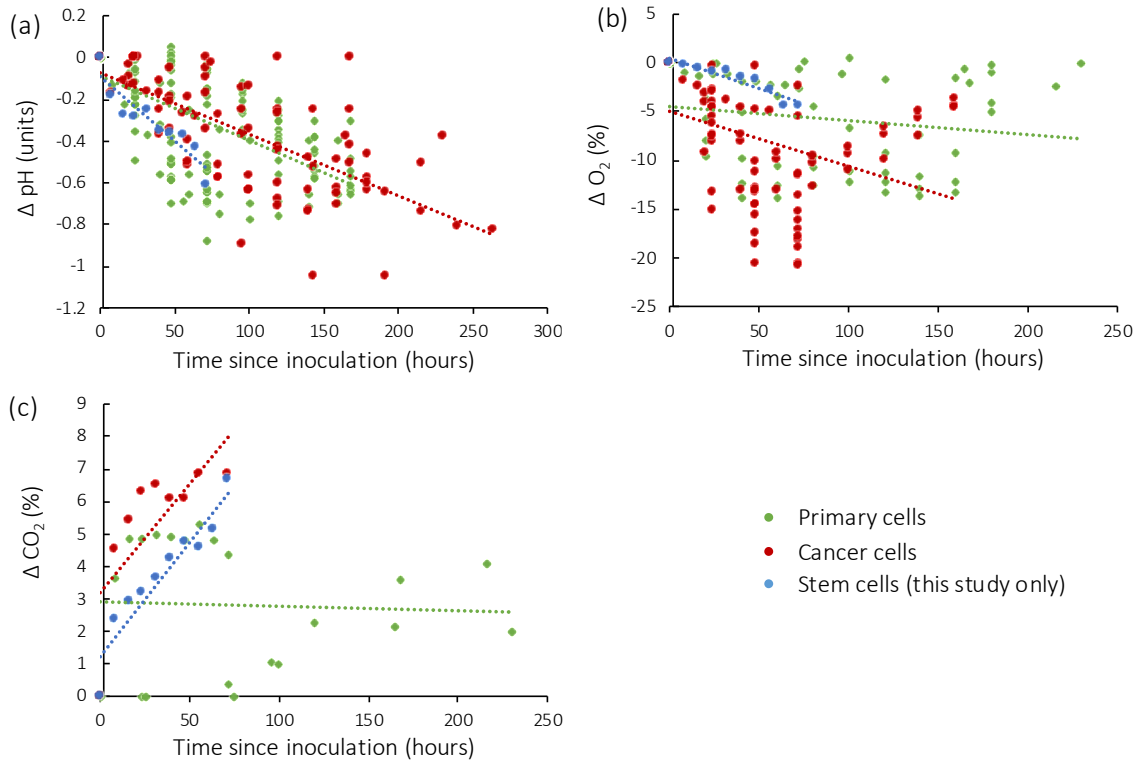

**Figure S4.** A comparison of relationships between changes in (a) pH, (b) dO<sub>2</sub>, and (c) dCO<sub>2</sub> and incubation time (hours since inoculation) among primary cells, cancer cells, and stem cells (cf. Data Availability section). Delta ( $\Delta$ ) values for pH, dO<sub>2</sub>, and dCO<sub>2</sub> represent the difference between the levels measured throughout the incubation periods minus measurements taken at time zeros. Data points represent raw values obtained from the published studies.

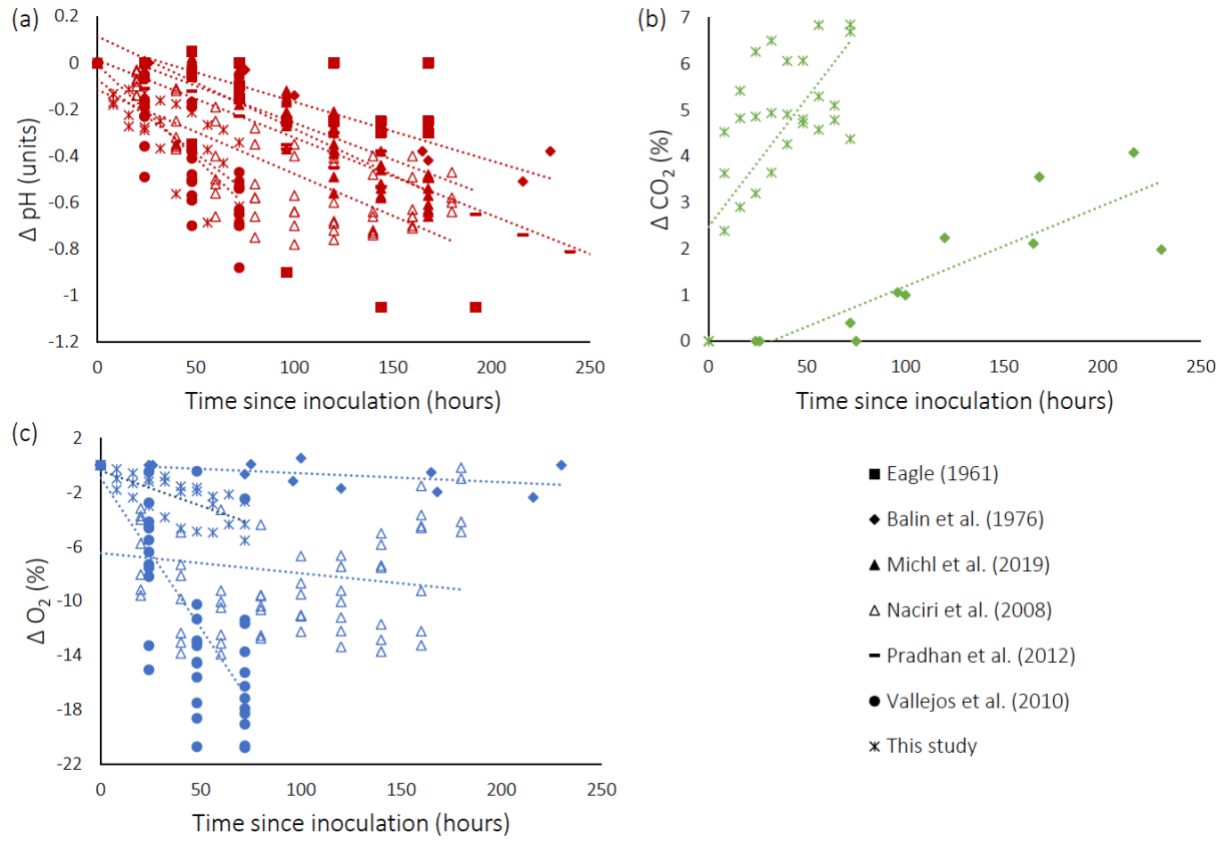

**Figure S5.** A comparison of relationships between changes in (a) pH, (b) dCO<sub>2</sub>, and (c) dO<sub>2</sub> and incubation time (hours since inoculation) among the seven studies, regardless of cell type (cf. Data Availability section). Delta ( $\Delta$ ) values for pH, dO<sub>2</sub>, and dCO<sub>2</sub> represent the difference between the levels measured throughout the incubation periods minus measurements taken at time zero. Data points represent raw values obtained from the published studies.

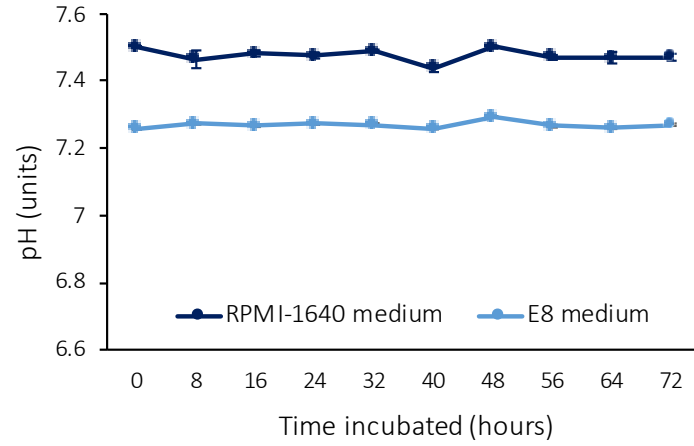

**Figure S6** Time course of pH measured every eight hours in cell-free media (RPMI-1640 and E8 medium) during 72 hours of culture. Measurements conducted for three culture flasks per cell line (three biological replicates each). Data points represent mean  $\pm$  1 standard error.

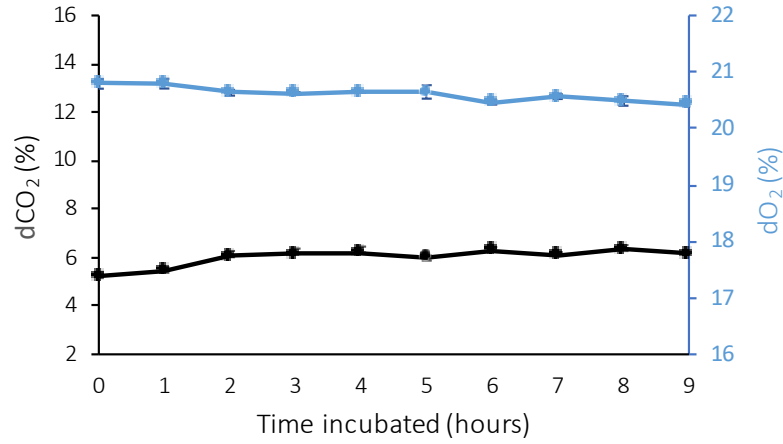

**Figure S7 Temporally fine-scale measurements of dissolved gases show high stability of sensor spots.** Time-course of dO<sub>2</sub> and dCO<sub>2</sub> measured hourly in RPMI-1640 medium in the absence of cells. Measurements conducted for three culture flasks per cell line (three biological replicates each). Data points represent mean  $\pm$  1 standard error.



**Table S1.** Summary of results for Pearson correlation analyses measuring the statistical association between changes in environmental parameters (O<sub>2</sub>, CO<sub>2</sub>, and pH) and cell growth (%) in cell line cultures of H1 hESC, K562, and GM12878.

| <b>Variables analyzed</b>                | <b>Cell type</b> | <b>Pearson correlation value</b> | <b>Significance (p-value)</b> | <b>Number of observations</b> | <b>Figure location</b> |
|------------------------------------------|------------------|----------------------------------|-------------------------------|-------------------------------|------------------------|
| <b>ΔO<sub>2</sub> - cell growth (%)</b>  | H1 (hESCs)       | -0.891                           | <0.001                        | 12                            | Fig. 4a                |
|                                          | GM12878          | -0.857                           | 0.002                         | 10                            |                        |
|                                          | K562             | -0.912                           | <0.001                        | 9                             |                        |
| <b>ΔCO<sub>2</sub> - cell growth (%)</b> | H1 (hESCs)       | 0.808                            | 0.001                         | 12                            | Fig. 4b                |
|                                          | GM12878          | 0.413                            | 0.235                         | 10                            |                        |
|                                          | K562             | 0.643                            | 0.062                         | 9                             |                        |
| <b>ΔpH - cell growth (%)</b>             | H1 (hESCs)       | -0.755                           | 0.005                         | 12                            | Fig. 4c                |
|                                          | GM12878          | -0.880                           | <0.001                        | 10                            |                        |
|                                          | K562             | -0.964                           | <0.001                        | 9                             |                        |

**Table S2.** Summary of results for Pearson correlation analyses measuring the statistical association between changes in environmental parameters (O<sub>2</sub>, CO<sub>2</sub>, and pH) in cell line cultures of H1 hESC, K562, and GM12878.

| <b>Variables analyzed</b>              | <b>Cell type</b> | <b>Pearson correlation value</b> | <b>Significance (p-value)</b> | <b>Number of observations</b> | <b>Figure location</b> |
|----------------------------------------|------------------|----------------------------------|-------------------------------|-------------------------------|------------------------|
| $\Delta\text{pH} - \Delta\text{CO}_2$  | H1 (hESCs)       | -0.582                           | < 0.001                       | 36                            | Fig. 5a                |
|                                        | GM12878          | -0.484                           | 0.004                         | 33                            |                        |
|                                        | K562             | -0.761                           | < 0.001                       | 30                            |                        |
| $\Delta\text{O}_2 - \Delta\text{CO}_2$ | H1 (hESCs)       | -0.570                           | < 0.001                       | 36                            | Fig. 5b                |
|                                        | GM12878          | -0.574                           | < 0.001                       | 33                            |                        |
|                                        | K562             | -0.734                           | < 0.001                       | 30                            |                        |
| $\Delta\text{pH} - \Delta\text{O}_2$   | H1 (hESCs)       | 0.824                            | < 0.001                       | 36                            | Fig. 5c                |
|                                        | GM12878          | 0.920                            | < 0.001                       | 33                            |                        |
|                                        | K562             | 0.887                            | < 0.001                       | 30                            |                        |

**Table S3.** Summary of results for Pearson correlation analyses measuring the statistical association between changes in environmental parameters in mammalian cell cultures categorized as belonging to one of three main categories (primary cells, cancer cells, or stem cells).

| <b>Variables analyzed</b>              | <b>Cell type</b> | <b>Pearson correlation value</b> | <b>Significance (p-value)</b> | <b>Number of observations</b> | <b>Figure location</b> |
|----------------------------------------|------------------|----------------------------------|-------------------------------|-------------------------------|------------------------|
| $\Delta\text{pH} - \Delta\text{CO}_2$  | Primary cells    | -0.514                           | 0.017                         | 21                            | Fig. 6a                |
|                                        | Cancer cells     | -0.768                           | 0.016                         | 9                             |                        |
|                                        | Stem cells       | -0.982                           | < 0.001                       | 10                            |                        |
| $\Delta\text{O}_2 - \Delta\text{CO}_2$ | Primary cells    | -0.806                           | < 0.001                       | 21                            | Fig. 6b                |
|                                        | Cancer cells     | -0.868                           | 0.002                         | 9                             |                        |
|                                        | Stem cells       | -0.849                           | 0.002                         | 10                            |                        |
| $\Delta\text{pH} - \Delta\text{O}_2$   | Primary cells    | 0.709                            | < 0.001                       | 61                            | Fig. 6c                |
|                                        | Cancer cells     | 0.653                            | < 0.001                       | 84                            |                        |
|                                        | Stem cells       | 0.867                            | 0.001                         | 10                            |                        |

**Table S4.** A detailed list of key resources used in the study, including reagents, equipment, software, and cell lines. The list specifies the manufacturer and manufacturer identifier for each resource used.

| <b>REAGENT or RESOURCE</b>         | <b>SOURCE</b>     | <b>IDENTIFIER</b>   |
|------------------------------------|-------------------|---------------------|
| <b><u>Reagents</u></b>             |                   |                     |
| RPMI-1640                          | Thermo Fisher     | 31800105            |
| FBS                                | Gibco             | 26140-079           |
| PBS                                | Gibco             | 14190144            |
| P/S                                | Gibco             | 15070-063           |
| T-75 flasks                        | VWR               | 734-0050            |
| Sodium bicarbonate                 | Gibco             | 25080-102           |
| MycoAlert                          | Lonza             | LT07-118            |
| Buffer solution pH 4               | Fisher Scientific | SB101-500           |
| Buffer solution pH 7               | Fisher Scientific | SB107-500           |
| Buffer solution pH 10              | Fisher Scientific | SB115-500           |
| Essential 8 medium (E8)            | ThermoFisher      | A1517001            |
| TrypLE                             | ThermoFisher      | 12604013            |
| T-25 flask                         | VWR               | 10062-874           |
| rh laminin-521                     | Life Technologies | A29249              |
| Lactate kit                        | Sigma             | Mak064              |
| <b><u>Equipment</u></b>            |                   |                     |
| Hera i150 incubator                | Thermo Scientific | 50116047            |
| CO <sub>2</sub> meter              | PreSens           | CO2-1 SMA           |
| O <sub>2</sub> meter               | PreSens           | OXY-2 SMA           |
| CO <sub>2</sub> sensor dots        | PreSens           | SP-CD1-D5-rMy-US    |
| Silicone glue                      | PreSens           | SG-KiwikSil         |
| O <sub>2</sub> sensor dots         | PreSens           | SP-PSt3-NAU-D10-YOP |
| Table top pH meter                 | Thermo Fisher     | 2115001             |
| Countess II Automated cell counter | Thermo Fisher     | AMQAF1000           |

|                     |         |       |
|---------------------|---------|-------|
| Inverted microscope | Olympus | CKX53 |
|---------------------|---------|-------|

|                                |        |     |
|--------------------------------|--------|-----|
| <b>Synergy H1 plate reader</b> | BioTek | N/A |
|--------------------------------|--------|-----|

**Software or platform**

|      |     |            |
|------|-----|------------|
| SPSS | IBM | version 27 |
|------|-----|------------|

|                              |         |               |
|------------------------------|---------|---------------|
| PreSens Measurement Studio 2 | PreSens | Version 3.0.3 |
|------------------------------|---------|---------------|

**Cell lines**

|         |         |     |
|---------|---------|-----|
| GM12878 | Coriell | N/A |
|---------|---------|-----|

|      |      |     |
|------|------|-----|
| K562 | ATCC | N/A |
|------|------|-----|

|         |        |     |
|---------|--------|-----|
| H1 hESC | Wicell | N/A |
|---------|--------|-----|
